# Supplementary material for: Detection of human bocavirus in Saudi healthy blood donors
Source: PubMed Central journal article supplement (PMC5831472; doi:10.1371/journal.pone.0193594), 2018-02-28
Supplement: pone.0193594.s001.pdf [file pone.0193594.s001.pdf]

**Supplement 1: Deduced nucleotide sequence of the VP1/NC of HBoV-1 from Saudi blood donors in comparison to different HBoV published strains.**

|                                    |             |             |             |             |             |              |                 |                |
|------------------------------------|-------------|-------------|-------------|-------------|-------------|--------------|-----------------|----------------|
| DQ000495.1 st1                     | AGCTGTGAAA  | TTGTATGGGA  | AGTAGAAAGA  | TACGCAACAA  | AGAACTGGCG  | TCCAGAAAGA   | AGACATACTG      | CACTCGGGAT     |
| FJ695472.1 KU1                     | .....       | .....       | .....       | .....       | .....       | .....        | .....           | .....          |
| DQ000496.1 st2                     | .....       | .....       | G.....      | .....       | .....       | .....        | .....           | .....          |
| NC_007455.1                        | .....       | .....       | G.....      | .....       | .....       | .....        | .....           | .....          |
| GQ925675.1 KU2                     | .....       | .....       | G.....      | .....       | .....       | .....        | .....           | .....          |
| JX887482.1 ZJ92                    | .....       | .....       | G.....      | .....       | .....       | .....        | .....           | .....          |
| JF327788.1 TUN4134                 | .....       | .....       | G.....      | .....       | .....       | .....        | .....           | .....          |
| KU557404 Eg/BSU-1                  | .....       | .....       | G.....      | .....       | .....       | .....        | .....           | .....          |
| JQ411251.1 KU3                     | .....G..... | .....       | .....A..... | .....       | .....       | .....        | .....           | .....          |
| JF327787.1 TUN2922                 | .....       | .....       | .....A..... | .....       | .....       | .....        | .....           | .....          |
| KU557405 Eg/BSU-2                  | .....       | .....       | .....       | .....       | .....       | .....        | .....           | .....          |
| KU557406 Eg/BSU-3                  | .....G..... | .....       | .....       | .....       | .....       | .....        | .....           | .....          |
| AB481071.1 _JPOC06-007             | .....G..... | .....       | .....       | .....       | .....       | .....        | .....           | .....          |
| JF699044.1 IR-RIGLD-PA5176         | .....G..... | .....       | .....       | .....       | .....       | .....        | .....           | .....T.....    |
| MF977917 Taif-4                    | .....G..... | .....       | .....       | .....       | .....       | .....        | .....           | .....          |
| MF977918 Taif-5                    | .....G..... | .....       | .....       | .....       | .....       | .....        | .....           | .....          |
| MF977919 Taif-6                    | .....G..... | .....       | .....       | .....       | .....       | .....        | .....           | .....          |
| MF977920 Taif-7                    | .....G..... | .....       | .....       | .....       | .....       | .....        | .....           | .....          |
| MF977921 Taif-8                    | .....G..... | .....       | .....       | .....       | .....       | .....        | .....           | .....          |
| MF977922 Taif-9                    | .....G..... | .....       | .....       | .....       | .....       | .....        | .....           | .....          |
| MF977923 Taif-10                   | .....G..... | .....       | .....       | .....       | .....       | .....        | .....           | .....          |
| MF977924 Taif-11                   | .....G..... | .....       | .....       | .....       | .....       | .....        | .....           | .....          |
| MF977925 Taif-12                   | .....G..... | .....       | .....       | .....       | .....       | .....        | .....           | .....          |
| MF977926 Taif-13                   | .....G..... | .....       | .....       | .....       | .....       | .....        | .....           | .....          |
| MF977927 Taif-14                   | .....G..... | .....       | .....       | .....       | .....       | .....        | .....           | .....          |
| MF977928 Taif-15                   | .....G..... | .....       | .....       | .....       | .....       | .....        | .....           | .....          |
| MF977929 Taif_16                   | .....G..... | .....       | .....       | .....       | .....       | .....        | .....           | .....          |
| MF977930 Taif_17                   | .....G..... | .....       | .....       | .....       | .....       | .....        | .....           | .....          |
| MF977931 Taif_18                   | .....G..... | .....       | .....       | .....       | .....       | .....        | .....           | .....          |
| MF977932 Taif_19                   | .....G..... | .....       | .....       | .....       | .....       | .....        | .....           | .....          |
| MF977933 Taif-20                   | .....G..... | .....       | .....       | .....       | .....       | .....        | .....           | .....          |
| MF977934 Taif_21                   | .....G..... | .....       | .....       | .....       | .....       | .....        | .....           | .....          |
| MF977935 Taif-22                   | .....G..... | .....       | .....       | .....       | .....       | .....        | .....           | .....          |
| MF977936 Taif-23                   | .....G..... | .....       | .....       | .....       | .....       | .....        | .....           | .....          |
| MF977937 Taif-24                   | .....G..... | .....       | .....       | .....       | .....       | .....        | .....           | .....          |
| GU048664.1 HBoV-2 CU1557UK         | .....C..... | .....C..... | .....T..... | .....       | .....A..... | A.....G..... | .....C..C.....  | .....T..TC.    |
| GQ200737.1 HBoV-2 KU1              | .....C..... | .....C..... | .....T..... | .....       | .....A..... | A.....       | .....C..C.....  | .....T..TC.    |
| KM624025.1 HBoV-2 LZFB080          | .....C..... | .....C..... | .....T..... | .....       | .....A..... | A.....G..... | .....C..C.....  | .....G..T..TC. |
| FJ973558.1 HBoV2A-TU-A-114-06      | .....C..... | .....C..... | .....T..... | .....       | .....A..... | A.....G..... | .....C..C.....  | .....T..TC.    |
| GQ867666.1 HBoV-3 MC8              | .....C..... | .....C..... | .....T..... | .....T..... | .....A..... | A.....       | .....C..A.....  | .....CC.       |
| gFJ948861.1 HBoV-3 W855            | .....C..... | .....C..... | .....C..... | .....T..... | .....A..... | A.....       | .....C..A.....  | .....CC.       |
| FJ973562.1 HBoV3B-TU-A-210-07      | .....C..... | .....C..... | .....C..... | .....T..... | .....A..... | A.....       | .....C..A.....  | .....CC.       |
| NC_012564.1 HBoV-3                 | .....C..... | .....C..... | .....C..... | .....T..... | .....A..... | A.....       | .....C..A.....  | .....CC.       |
| KJ649742.1 HBoV-4 RUS_NSC_11-N2657 | .....C..... | .....C..... | .....T..... | .....T..... | .....A..... | A.....       | .....C..AA..... | .....T..T..TC. |
| FJ973561.2 HBoV-4-NI-385           | .....C..... | .....C..... | .....T..... | .....T..... | .....A..... | A.....       | .....C..AA..... | .....T..T..TC. |
| KJ649741.1 HBoV-4 RUS_NSC_11-N2655 | .....C..... | .....C..... | .....T..... | .....T..... | .....A..... | A.....       | .....C..AA..... | .....T..T..TC. |

Supplement 1 continue

|                                    |       |          |       |       |       |       |       |
|------------------------------------|-------|----------|-------|-------|-------|-------|-------|
| DQ000495.1 st1                     | GTC   | ACT      | TAC   | GTG   | CAG   | CAT   | ACG   |
| FJ695472.1 KU1                     | ..... | .....    | ..... | ..... | ..... | ..... | ..... |
| DQ000496.1 st2                     | ..... | .....    | ..... | ..... | ..... | ..... | ..... |
| NC_007455.1                        | ..... | .....    | ..... | ..... | ..... | ..... | ..... |
| GQ925675.1 KU2                     | ..... | .....    | ..... | ..... | ..... | ..... | ..... |
| JX887482.1 ZJ92                    | ..... | .....    | ..... | ..... | ..... | ..... | ..... |
| JF327788.1 TUN4134                 | ..... | .....    | ..... | ..... | ..... | ..... | ..... |
| KU557404 Eg/BSU-1                  | ..... | .....    | ..... | ..... | ..... | ..... | ..... |
| JQ411251.1 KU3                     | ..... | .....    | ..... | ..... | ..... | ..... | ..... |
| JF327787.1 TUN2922                 | ..... | .....    | ..... | ..... | ..... | ..... | ..... |
| KU557405 Eg/BSU-2                  | ..... | .....    | ..... | ..... | ..... | ..... | ..... |
| KU557406 Eg/BSU-3                  | ..... | .....    | ..... | ..... | ..... | ..... | ..... |
| AB481071.1 _JPOC06-007             | ..... | .....    | ..... | ..... | ..... | ..... | ..... |
| JF699044.1 IR-RIGLD-PA5176         | ..... | .....    | ..... | ..... | ..... | ..... | ..... |
| MF977917 Taif-4                    | ..... | .....    | ..... | ..... | ..... | ..... | ..... |
| MF977918 Taif-5                    | ..... | .....    | ..... | ..... | ..... | ..... | ..... |
| MF977919 Taif-6                    | ..... | .....    | ..... | ..... | ..... | ..... | ..... |
| MF977920 Taif-7                    | ..... | .....    | ..... | ..... | ..... | ..... | ..... |
| MF977921 Taif-8                    | ..... | .....    | ..... | ..... | ..... | ..... | ..... |
| MF977922 Taif-9                    | ..... | .....    | ..... | ..... | ..... | ..... | ..... |
| MF977923 Taif-10                   | ..... | .....    | ..... | ..... | ..... | ..... | ..... |
| MF977924 Taif-11                   | ..... | .....    | ..... | ..... | ..... | ..... | ..... |
| MF977925 Taif-12                   | ..... | .....    | ..... | ..... | ..... | ..... | ..... |
| MF977926 Taif-13                   | ..... | .....    | ..... | ..... | ..... | ..... | ..... |
| MF977927 Taif-14                   | ..... | .....    | ..... | ..... | ..... | ..... | ..... |
| MF977928 Taif-15                   | ..... | .....    | ..... | ..... | ..... | ..... | ..... |
| MF977929 Taif_16                   | ..... | .....    | ..... | ..... | ..... | ..... | ..... |
| MF977930 Taif-17                   | ..... | .....    | ..... | ..... | ..... | ..... | ..... |
| MF977931 Taif_18                   | ..... | .....    | ..... | ..... | ..... | ..... | ..... |
| MF977932 Taif-19                   | ..... | .....    | ..... | ..... | ..... | ..... | ..... |
| MF977933 Taif-20                   | ..... | .....    | ..... | ..... | ..... | ..... | ..... |
| MF977934 Taif_21                   | ..... | .....    | ..... | ..... | ..... | ..... | ..... |
| MF977935 Taif-22                   | ..... | .....    | ..... | ..... | ..... | ..... | ..... |
| MF977936 Taif-23                   | ..... | .....    | ..... | ..... | ..... | ..... | ..... |
| MF977937 Taif-24                   | ..... | .....    | ..... | ..... | ..... | ..... | ..... |
| GU048664.1 HBoV-2 CU1557UK         | TGG   | AGAA     | ATA   | AT    | CAA   | AA    | AA    |
| GQ200737.1 HBoV-2 KU1              | TGG   | AGAA     | GTA   | AT    | CAA   | AA    | AA    |
| KM624025.1 HBoV-2 LZFB080          | TGG   | AGAA     | ATA   | AT    | CAA   | AA    | AA    |
| FJ973558.1 HBoV2A-TU-A-114-06      | TGG   | AGAA     | ATA   | AT    | CAA   | AA    | AA    |
| GQ867666.1 HBoV-3 MC8              | TGG   | CAGATG   | AATT  | AC    | CAA   | AT    | AA    |
| gFJ948861.1 HBoV-3 W855            | TGG   | G.CAGATG | AAT   | AC    | CAA   | AC    | AA    |
| FJ973562.1 HBoV3B-TU-A-210-07      | TGG   | G.CAGATG | AAT   | AC    | CAA   | AC    | AA    |
| NC_012564.1 HBoV-3                 | TGG   | G.CAGATG | AAT   | AC    | CAA   | AC    | AA    |
| KJ649742.1 HBoV-4 RUS_NSC_11-N2657 | TGG   | CTGA     | TA    | AT    | CAA   | AC    | AA    |
| FJ973561.2 HBoV-4-NI-385           | TGG   | CTGA     | TA    | AT    | CAA   | AC    | AA    |
| KJ649741.1 HBoV-4 RUS_NSC_11-N2655 | TGG   | CTGA     | TA    | AT    | CAA   | AC    | AA    |

Supplement 1 continue

|                                    |            |             |            |           |            |            |            |            |
|------------------------------------|------------|-------------|------------|-----------|------------|------------|------------|------------|
| DQ000495.1 st1                     | ATCAGTGTAT | GCCAGTAAAA  | ACAAACATCA | ATAAAGTGT | GTAATCTTAT | AAGCCTCTTT | TTTGCTTCTG | CTTACAAGTT |
| FJ695472.1 KU1                     | ...A...    | .....       | .....      | .....     | .....      | .....      | .....      | .....      |
| DQ000496.1 st2                     | .....      | .....       | .....      | .....     | .....      | .....      | .....      | .....      |
| NC_007455.1                        | .....      | .....       | .....      | .....     | .....      | .....      | .....      | .....      |
| GQ925675.1 KU2                     | .....      | .....       | .....      | .....     | .....      | .....      | .....      | .....      |
| JX887482.1 ZJ92                    | .....      | .....G..    | .....      | .....     | .....      | .....      | .....      | .....      |
| JF327788.1 TUN4134                 | .....      | .....       | .....      | .....     | .....      | .....      | .....      | .....      |
| KU557404 Eg/BSU-1                  | .....      | .....       | .....      | .....     | .....      | .....      | .....      | .....      |
| JQ411251.1 KU3                     | ...A...    | .....       | .....      | .....     | .....      | .....      | .....      | .....      |
| JF327787.1 TUN2922                 | ...A...    | .....       | .....      | .....     | .....      | .....      | .....      | .....      |
| KU557405 Eg/BSU-2                  | ...A...    | .....       | .....      | .....     | .....      | .....      | .....      | .....      |
| KU557406 Eg/BSU-3                  | ...A...    | .....       | .....      | .....     | .....      | .....      | .....      | .....      |
| AB481071.1 _JPOC06-007             | .....      | .....       | .....      | .....     | .....      | .....      | .....      | .....      |
| JF699044.1 IR-RIGLD-PA5176         | .....      | .....       | .....      | .....     | .....C..   | .....      | .....      | .....      |
| MF977917 Taif-4                    | ...A...    | .....       | .....      | .....     | .....      | .....      | .....      | .....      |
| MF977918 Taif-5                    | .....      | .....       | .....      | .....     | .....      | .....      | .....      | .....      |
| MF977919 Taif-6                    | ...A...    | .....       | .....      | .....     | .....      | .....      | .....      | .....      |
| MF977920 Taif-7                    | ...A...    | .....       | .....      | .....     | .....      | .....      | .....      | .....      |
| MF977921 Taif-8                    | ...A...    | .....       | .....      | .....     | .....      | .....      | .....      | .....      |
| MF977922 Taif-9                    | .....      | .....       | .....      | .....     | .....      | .....      | .....      | .....      |
| MF977923 Taif-10                   | .....      | .....       | .....      | .....     | .....      | .....      | .....      | .....      |
| MF977924 Taif-11                   | ...A...    | .....       | .....      | .....     | .....      | .....      | .....T..   | .....      |
| MF977925 Taif-12                   | .....      | .....       | .....      | .....     | .....      | .....      | .....      | .....      |
| MF977926 Taif-13                   | .....      | .....       | .....      | .....     | .....      | .....      | .....      | .....      |
| MF977927 Taif-14                   | .....      | .....       | .....      | .....     | .....      | .....      | .....      | .....      |
| MF977928 Taif-15                   | .....      | .....       | .....      | .....     | .....      | .....      | .....      | .....      |
| MF977929 Taif_16                   | ...A...    | .....       | .....      | .....     | .....      | .....      | .....      | .....      |
| MF977930 Taif-17                   | .....      | .....       | .....      | .....     | .....      | .....      | .....      | .....      |
| MF977931 Taif_18                   | .....      | .....       | .....      | .....     | .....      | .....      | .....      | .....      |
| MF977932 Taif-19                   | .....      | .....       | .....      | .....     | .....      | .....      | .....      | .....      |
| MF977933 Taif-20                   | .....      | .....       | .....      | .....     | .....      | .....      | .....      | .....      |
| MF977934 Taif_21                   | .....      | .....       | .....      | .....     | .....      | .....      | .....      | .....      |
| MF977935 Taif-22                   | .....      | .....       | .....      | .....     | .....      | .....      | .....      | .....      |
| MF977936 Taif-23                   | .....      | .....       | .....      | .....     | .....      | .....      | .....      | .....      |
| MF977937 Taif-24                   | .....      | .....       | .....      | .....     | .....      | .....      | .....      | .....      |
| GU048664.1 HBoV-2 CU1557UK         | .CAT...CTA | T...TA.C... | .....      | .....     | .....A.CT. | .....G..C  | A.....A..  | .....T.... |
| GQ200737.1 HBoV-2 KU1              | .CAT...CTA | T...TA.C... | .....      | .....     | .....CT.   | .....G..C  | A.....A..  | .....T.... |
| KM624025.1 HBoV-2 LZFB080          | .CAT...CTA | T...TA.C... | .....      | .....     | .....CT.   | .....G..C  | A.....A..  | .....T.... |
| FJ973558.1 HBoV2A-TU-A-114-06      | .CAT...CTA | T...TA.C... | .....      | .....     | .....CT.   | .....A..C  | A.....A..  | .....T.... |
| GQ867666.1 HBoV-3 MC8              | .CAT...CT. | T....T...   | .....      | .....     | .....CT.   | .....      | A.....AC.  | ...GT....  |
| gFJ948861.1 HBoV-3 W855            | .CAT...CT. | T....T...   | .....      | .....     | .....CT.   | .....      | A.....AC.  | ...GT....  |
| FJ973562.1 HBoV3B-TU-A-210-07      | .CAT...CT. | T....T...   | .....T.    | .....     | .....CT.   | .....      | A.....AC.  | ...GT....  |
| NC_012564.1 HBoV-3                 | .CAT...CT. | T....T...   | .....      | .....     | .....CT.   | .....      | A.....AC.  | ...GT....  |
| KJ649742.1 HBoV-4 RUS_NSC_11-N2657 | .CAT...CT. | T....T...   | .....      | .....     | .....T.CT. | .....      | A.....AC.  | ...T....   |
| FJ973561.2 HBoV-4-NI-385           | .CAT...CT. | T....T...   | .....      | .....     | .....C..C. | .....      | A.....     | ...T....   |
| KJ649741.1 HBoV-4 RUS_NSC_11-N2655 | .CAT...CT. | T....T...   | .....      | .....     | .....T.CT. | .....      | A.....AC.  | ...T....   |

Supplement 1 continue

|                                    |            |            |            |            |            |            |              |            |
|------------------------------------|------------|------------|------------|------------|------------|------------|--------------|------------|
| DQ000495.1 st1                     | CCTCCTCAAT | GGACAAGCGG | AAAGTGAAGG | GTGACTGTAG | TCCTGAGCTC | ATGGGTCAA  | GACCACAGCC   | CGATGGTAGT |
| FJ695472.1 KU1                     | .....      | .....      | .....      | .....      | .....      | .....      | .....        | .....      |
| DQ000496.1 st2                     | .....      | .....      | .....      | .....      | .....      | .....      | .....        | .....      |
| NC_007455.1                        | .....      | .....      | .....      | .....      | .....      | .....      | .....        | .....      |
| GQ925675.1 KU2                     | .....      | .....      | .....      | .....      | .....      | .....      | .....        | .....      |
| JX887482.1 ZJ92                    | .....      | .....      | .....      | .....      | .....      | .....      | .....        | .....      |
| JF327788.1 TUN4134                 | .....      | .....      | .....      | .....      | .....      | .....      | .....        | .....      |
| KU557404 Eg/BSU-1                  | .....      | .....      | .....      | .....      | .....      | .....      | .....        | .....      |
| JQ411251.1 KU3                     | .....      | .....      | .....      | .....      | .....      | .....      | .....        | .....      |
| JF327787.1 TUN2922                 | .....      | .....      | .....      | .....      | .....      | .....      | .....        | .....      |
| KU557405 Eg/BSU-2                  | .....      | .....      | .....      | .....      | .....      | .....      | .....        | .....      |
| KU557406 Eg/BSU-3                  | .....      | .....      | .....      | .....      | .....      | .....      | .....        | .....      |
| AB481071.1 _JPOC06-007             | .....      | .....      | .....      | .....      | .....      | .....      | .....        | .....      |
| JF699044.1 IR-RIGLD-PA5176         | .....      | .....      | .....      | .....      | .....      | .....      | .....        | .....      |
| MF977917 Taif-4                    | .....      | .....      | .....      | .....      | .....      | .....      | .....        | .....      |
| MF977918 Taif-5                    | .....      | .....      | .....      | .....      | .....      | .....      | .....        | .....      |
| MF977919 Taif-6                    | .....      | .....      | .....      | .....      | .....      | .....      | .....        | .....      |
| MF977920 Taif-7                    | .....      | .....      | .....      | .....      | .....      | .....      | .....        | .....      |
| MF977921 Taif-8                    | .....      | .....      | .....      | .....      | .....      | .....      | .....        | .....      |
| MF977922 Taif-9                    | .....      | .....      | .....      | .....      | .....      | .....      | .....        | .....      |
| MF977923 Taif-10                   | .....      | .....      | .....      | .....      | .....      | .....      | .....        | .....      |
| MF977924 Taif-11                   | .....      | .....      | .....      | .....      | .....      | .....      | .....        | .....      |
| MF977925 Taif-12                   | .....      | .....      | .....      | .....      | C          | .....      | .....        | .....      |
| MF977926 Taif-13                   | .....      | .....      | .....      | .....      | .....      | .....      | .....        | .....      |
| MF977927 Taif-14                   | .....      | .....      | .....      | .....      | .....      | .....      | .....        | .....      |
| MF977928 Taif-15                   | .....      | .....      | .....      | .....      | .....      | .....      | .....        | .....      |
| MF977929 Taif_16                   | .....      | .....      | .....      | .....      | .....      | .....      | .....        | .....      |
| MF977930 Taif-17                   | .....      | .....      | .....      | .....      | .....      | .....      | .....        | .....      |
| MF977931 Taif_18                   | .....      | .....      | .....      | .....      | .....      | .....      | .....        | .....      |
| MF977932 Taif-19                   | .....      | .....      | .....      | .....      | .....      | .....      | .....        | .....      |
| MF977933 Taif-20                   | .....      | .....      | .....      | .....      | .....      | .....      | .....        | .....      |
| MF977934 Taif_21                   | .....      | .....      | .....      | .....      | .....      | .....      | .....        | .....      |
| MF977935 Taif-22                   | .....      | .....      | .....      | .....      | .....      | .....      | .....        | .....      |
| MF977936 Taif-23                   | .....      | .....      | .....      | .....      | .....      | .....      | .....        | .....      |
| MF977937 Taif-24                   | .....      | .....      | .....      | .....      | .....      | .....      | .....        | .....      |
| GU048664.1 HBoV-2 CU1557UK         | ...TC...   | ...A...    | ...AA...   | .....A     | ...C.....  | ...A...G.  | ...G.T...T.  | ...C...    |
| GQ200737.1 HBoV-2 KU1              | ...TC...   | ...A...    | ...AA...   | .....A     | ...C.....  | ...A...G.  | ...G.T...T.  | ...C...    |
| KM624025.1 HBoV-2 LZFB080          | ...TC...   | ...A...    | ...AA...   | .....A     | ...C.....  | ...TA...G. | ...G.T.T..T. | ...C...    |
| FJ973558.1 HBoV2A-TU-A-114-06      | ...TC...   | ...A...    | ...AA...   | .....A     | ...C.....  | ...A...G.  | ...G.T...T.  | ...C...    |
| GQ867666.1 HBoV-3 MC8              | ...TC...   | ...T...    | ...AA...   | .....A     | ...C.....  | ...CA...G. | ...G.T...T.  | ...C...    |
| gFJ948861.1 HBoV-3 W855            | ...TC...   | A...T...   | ...AA...   | .....A     | ...C.....  | ...A...G.  | ...G.T...T.  | ...C...    |
| FJ973562.1 HBoV3B-TU-A-210-07      | ...TC...   | ...T...    | ...AA...   | .....A     | ...C.....  | ...A...G.  | ...G.T...T.  | ...C...    |
| NC_012564.1 HBoV-3                 | ...TC...   | ...T...    | ...AA...   | .....A     | ...C.....  | ...A...G.  | ...G.T...T.  | ...C...    |
| KJ649742.1 HBoV-4 RUS_NSC_11-N2657 | ...C..C... | ...T...    | ...ACCC... | .....A     | ...C.....  | ...A...G.  | ...GAT.GG.G. | ...C...    |
| FJ973561.2 HBoV-4-NI-385           | ...TC...   | ...T...    | ...AA...   | .....A     | ...C.....  | ...A...G.  | ...G.T...T.  | ...C...    |
| KJ649741.1 HBoV-4 RUS_NSC_11-N2655 | ...TC...   | ...T...    | ...AAA...  | .....A     | ...C.....  | ...A.....  | ...G.T...T.  | ...C...    |

**Supplement 1 continue**

|                                    |               |            |            |             |             |           |
|------------------------------------|---------------|------------|------------|-------------|-------------|-----------|
| DQ000495.1 st1                     | GGTGTACCG     | TCTCGAACCT | AGCCGACA-G | CCCTTGTACA  | TTGIGGGGGG  | AGCTGTTTT |
| FJ695472.1 KU1                     | .....         | .....      | .....-     | .....       | .....       | .....     |
| DQ000496.1 st2                     | .....         | .....      | .....-     | .....       | .....       | .....     |
| NC_007455.1                        | .....         | .....      | .....-     | .....       | .....       | .....     |
| GQ925675.1 KU2                     | .....         | .....      | .....-     | .....       | .....       | .....     |
| JX887482.1 ZJ92                    | .....         | .....      | .....-     | .....       | .....       | .....     |
| JF327788.1 TUN4134                 | .....         | .....      | .....-     | .....       | .....       | .....     |
| KU557404 Eg/BSU-1                  | .....         | .....      | .....-     | .....       | .....       | .....     |
| JQ411251.1 KU3                     | .....         | .....      | .....-     | .....       | .....       | .....     |
| JF327787.1 TUN2922                 | .....         | .....      | .....-     | .....       | .....       | .....     |
| KU557405 Eg/BSU-2                  | .....         | .....      | .....-     | .....       | .....       | .....     |
| KU557406 Eg/BSU-3                  | .....         | .....      | .....-     | .....       | .....       | .....     |
| AB481071.1 _JPOC06-007             | .....         | .....      | .....-     | .....       | .....       | .....     |
| JF699044.1 IR-RIGLD-PA5176         | .....         | .....      | .....-     | .....       | .....       | .....     |
| MF977917 Taif-4                    | .....         | .....      | .....-     | .....       | .....       | .....     |
| MF977918 Taif-5                    | .....         | .....      | .....-     | .....       | .....       | .....     |
| MF977919 Taif-6                    | .....         | .....      | .....-     | .....       | .....       | .....     |
| MF977920 Taif-7                    | .....         | .....      | .....-     | .....       | .....       | .....     |
| MF977921 Taif-8                    | .....         | .....      | .....-     | .....       | .....       | .....     |
| MF977922 Taif-9                    | .....         | .....      | .....-     | .....       | .....       | .....     |
| MF977923 Taif-10                   | .....         | .....      | .....-     | .....       | .....       | .....     |
| MF977924 Taif-11                   | .....         | .....      | .....-     | .....       | .....       | .....     |
| MF977925 Taif-12                   | .....         | .....      | .....-     | .....       | .....       | .....     |
| MF977926 Taif-13                   | .....         | .....      | .....-     | .....       | .....       | .....     |
| MF977927 Taif-14                   | .....         | .....      | .....-     | .....       | .....       | .....     |
| MF977928 Taif-15                   | .....         | .....      | .....-     | .....       | .....       | .....     |
| MF977929 Taif_16                   | .....         | .....      | .....-     | .....       | .....       | .....     |
| MF977930 Taif-17                   | .....         | .....      | .....-     | .....       | .....       | .....     |
| MF977931 Taif_18                   | .....         | .....      | .....-     | .....       | .....       | .....     |
| MF977932 Taif-19                   | .....         | .....      | .....-     | .....       | .....       | .....     |
| MF977933 Taif-20                   | .....         | .....      | .....-     | .....       | .....       | .....     |
| MF977934 Taif_21                   | .....         | .....      | .....-     | .....       | .....       | .....     |
| MF977935 Taif-22                   | .....         | .....      | .....-     | .....       | .....       | .....     |
| MF977936 Taif-23                   | .....         | .....      | .....-     | .....       | .....       | .....     |
| MF977937 Taif-24                   | .....         | .....      | .....-     | .....       | .....       | .....     |
| GU048664.1 HBoV-2 CU1557UK         | .....G.....   | .....      | .....      | .....       | .....       | .....     |
| GQ200737.1 HBoV-2 KU1              | .....G.....   | .....      | .....TT.CA | .....G..... | .....A..... | .....     |
| KM624025.1 HBoV-2 LZFB080          | .....G.....   | .....      | .....TT.CT | .GAGA----   | .....       | .....     |
| FJ973558.1 HBoV2A-TU-A-114-06      | .....G.....   | .....      | .....TT.CA | .....G..... | .....       | .....     |
| GQ867666.1 HBoV-3 MC8              | .....G.....   | .....      | .....      | .....       | .....       | .....     |
| gFJ948861.1 HBoV-3 W855            | .....G.-      | .....      | .....      | .....       | .....       | .....     |
| FJ973562.1 HBoV3B-TU-A-210-07      | .....G.....   | .....      | .....TT.CA | .....       | .....       | .....     |
| NC_012564.1 HBoV-3                 | .....C.G..... | .....      | .....TT.CA | .....G..... | .....A..... | .....     |
| KJ649742.1 HBoV-4 RUS_NSC_11-N2657 | .....G.....   | .....      | .....TT.CA | .....G..... | .....A..... | .....     |
| FJ973561.2 HBoV-4-NI-385           | .....G.....   | .....      | .....TT.CA | .....       | .....       | .....     |
| KJ649741.1 HBoV-4 RUS_NSC_11-N2655 | .....         | .....      | .....      | .....       | .....       | .....     |

**Strains related to the HBoV-1 genotype are boxed.**  
**Representative strains from HBoV-2, HBoV-3 and HBoV-4 are included.**
